# Supplementary material for: Metagenomics Reveals That Intravenous Injection of Beta-Hydroxybutyric Acid (BHBA) Disturbs the Nasopharynx Microflora and Increases the Risk of Respiratory Diseases
Source: PubMed Central journal article supplement (PMC7892611; doi:10.3389/fmicb.2020.630280), 2021-02-05
Supplement: Table_1.pdf [file Table_1.pdf]

Table S1

A

| sample | reads    | bases      | N(%)    | GC(%) | Q20(%) | Q30(%) | HQ reads(%) | HQ data(%) |
|--------|----------|------------|---------|-------|--------|--------|-------------|------------|
| Z1     | 58647206 | 8797080900 | 0.00050 | 44.55 | 96.74  | 91.66  | 99.87       | 98.74      |
| Z2     | 59243294 | 8886494100 | 0.00052 | 44.10 | 96.79  | 91.77  | 99.87       | 98.78      |
| Z3     | 58022568 | 8703385200 | 0.00051 | 44.55 | 96.71  | 91.58  | 99.86       | 98.75      |
| G1     | 42558414 | 6383762100 | 0.00052 | 44.36 | 96.71  | 91.73  | 99.85       | 98.62      |
| G2     | 57766548 | 8664982200 | 0.00051 | 44.22 | 96.74  | 91.67  | 99.86       | 98.75      |
| G3     | 47370166 | 7105524900 | 0.00051 | 44.26 | 96.74  | 91.66  | 99.87       | 98.75      |
| G4     | 46240952 | 6936142800 | 0.00051 | 44.09 | 96.62  | 91.46  | 99.86       | 98.67      |
| G5     | 58700414 | 8805062100 | 0.00051 | 45.19 | 96.98  | 92.08  | 99.89       | 98.94      |
| GB1    | 45485312 | 6822796800 | 0.00051 | 44.54 | 96.40  | 91.00  | 99.85       | 98.58      |
| GB2    | 45606992 | 6841048800 | 0.00052 | 44.29 | 96.41  | 90.99  | 99.85       | 98.60      |
| GB3    | 49355106 | 7403265900 | 0.00051 | 44.46 | 96.86  | 91.99  | 99.87       | 98.71      |
| GB4    | 50242654 | 7536398100 | 0.00047 | 44.31 | 96.77  | 89.41  | 99.86       | 98.58      |
| GB5    | 58979374 | 8846906100 | 0.00051 | 45.75 | 96.29  | 90.79  | 99.83       | 98.54      |

B

| sample   | simpson        | chao1         | ACE           | shannon       |
|----------|----------------|---------------|---------------|---------------|
| Z1       | 0.987680045588 | 3262.97894737 | 3138.67067542 | 8.26444541089 |
| Z2       | 0.914091972926 | 1006.32608696 | 1058.7273298  | 5.83211012026 |
| Z3       | 0.985817697315 | 3138.35714286 | 3079.16498423 | 7.98361899825 |
| Mean±SEM | 0.96±0.04      | 2469±1268     | 2426±1184     | 7.36±1.33     |
| G1       | 0.933480701889 | 1230.0        | 1451.4216394  | 5.70485795898 |
| G2       | 0.980077413035 | 2724.21212121 | 2746.64394195 | 7.56212674836 |
| G3       | 0.961706614852 | 1514.7625     | 1777.1211615  | 6.41574749199 |
| G4       | 0.923092078136 | 1421.84615385 | 1477.94961595 | 6.02754909394 |
| G5       | 0.943820823744 | 1701.24418605 | 1847.6186861  | 5.99264882594 |
| Mean±SEM | 0.95±0.02      | 1718±587      | 1860±526      | 6.34±0.73     |
| GB1      | 0.887234200927 | 689.675675676 | 773.998134124 | 4.49269598904 |
| GB2      | 0.925009700325 | 1412.5326087  | 1655.73733074 | 5.8204070513  |
| GB3      | 0.868160481464 | 851.52        | 982.099122747 | 4.71190579809 |
| GB4      | 0.829719158665 | 638.115384615 | 771.384897277 | 4.0988758725  |
| GB5      | 0.745042731616 | 496.018518519 | 608.478972081 | 3.40184611007 |
| Mean±SEM | 0.85±0.07      | 818±356       | 958±412       | 4.51±0.89     |
